# Supplementary material
Source: publisher figshare collection journal article supplement (https://geolsoc.figshare.com/ndownloader/files/22318611)
Supplement: Supplementary file 1 [file 22318611]

## Sheet: Sheet1
Table A.1, U-Pb Data, Juárez-Zúñiga et al., 2020.
								CORRECTED RATIOS2										CORRECTED AGES (Ma)
Sample	U (ppm)1	Th (ppm)1	Th/U		207Pb/206Pb	±2s abs	207Pb/235U	±2s abs	206Pb/238U	±2s abs	208Pb/232Th	±2s abs	Rho		206Pb/238U	±2s	207Pb/235U	±2s	207Pb/206Pb	±2s	Best age (Ma)	±2s		Disc %
Zr_MAT1-P1_3	124.1	45.92	0.370024		0.0533	0.0044	0.296	0.023	0.0404	0.0013	0.0135	0.0013	-0.10931		255.4	8.1	262	18	290	180	255.4	8.1		2.51908
Zr_MAT1-P1_8	65.7	13.19	0.200761		0.049	0.0061	0.295	0.036	0.0421	0.0015	0.0145	0.0017	-0.049653		265.8	9	258	29	100	250	265.8	9		-3.02326
Zr_MAT1-P1_27	59	11	0.186441		0.072	0.011	0.431	0.066	0.0431	0.0023	0.0183	0.0043	0.14355		272	14	357	47	870	360	272	14		23.8095
Zr_MAT1-P1_16	90.9	23.9	0.262926		0.0508	0.0056	0.302	0.034	0.04314	0.0012	0.0135	0.0015	0.14958		272.3	7.6	265	26	190	220	272.3	7.6		-2.75472
Zr_MAT1-P1_2	80.5	19.44	0.241491		0.0513	0.0051	0.31	0.028	0.0434	0.0016	0.0135	0.0014	0.13124		273.6	9.6	275	23	240	210	273.6	9.6		0.509091
Zr_MAT1-P1_4	62.3	15.3	0.245586		0.0486	0.0061	0.302	0.039	0.0434	0.0017	0.0138	0.0019	-0.0041978		273.9	10	263	30	120	260	273.9	10		-4.14449
Zr_MAT1-P1_7	69.3	14	0.20202		0.0516	0.0053	0.319	0.031	0.0441	0.0016	0.0154	0.0016	-0.12422		278	9.9	278	24	220	220	278	9.9		0
Zr_MAT1-P1_32	37.2	6.5	0.174731		0.063	0.0053	0.79	0.11	0.094	0.011	0.0295	0.0053	0.73625		577	63	570	62	640	190	577	63		-1.22807
Zr_MAT1-P1_30	96.1	51.2	0.532778		0.0693	0.0042	1	0.14	0.104	0.012	0.0401	0.0038	0.93619		634	73	687	73	894	110	634	73		7.7147
Zr_MAT1-P1_36	101	7.76	0.0768317		0.0709	0.0038	1.628	0.082	0.1633	0.0035	0.0475	0.0054	-0.070926		975	20	982	33	955	110	975	20		0.712831
Zr_MAT1-P1_28	13.04	2	0.153374		0.0682	0.0074	1.6	0.17	0.1636	0.0058	0.053	0.011	0.23776		976	32	952	67	850	220	976	32		-2.52101
Zr_MAT1-P1_10	386	130.2	0.337306		0.0724	0.0029	1.683	0.069	0.1677	0.0033	0.0509	0.0027	0.1889		999.6	18	1001	26	1002	81	999.6	18		0.13986
Zr_MAT1-P1_31	338.7	42	0.124004		0.074	0.0031	1.756	0.081	0.1704	0.0047	0.0489	0.0034	0.67495		1014	26	1028	29	1035	83	1014	26		1.36187
Zr_MAT1-P1_25	108.4	8.36	0.0771218		0.0718	0.0036	1.734	0.086	0.1739	0.0042	0.0557	0.0053	0.22574		1033	23	1019	32	985	100	1033	23		-1.3739
Zr_MAT1-P1_23	229.8	191	0.831158		0.0726	0.0031	1.768	0.076	0.1753	0.0037	0.048	0.0026	0.086746		1041	20	1033	28	996	90	1041	20		-0.774443
Zr_MAT1-P1_24	83	6.2	0.0746988		0.0762	0.0042	1.907	0.1	0.179	0.005	0.0591	0.0086	0.10636		1061	27	1081	36	1079	110	1061	27		1.85014
Zr_MAT1-P1_20	534	90.3	0.169101		0.0759	0.0029	1.907	0.078	0.183	0.0039	0.054	0.0029	0.55488		1083	21	1085	26	1088	78	1083	21		0.184332
Zr_MAT1-P1_18	105.5	29.9	0.283412		0.0755	0.0035	1.924	0.09	0.1845	0.004	0.0561	0.0038	0.23513		1091	22	1087	31	1068	93	1091	22		-0.367985
Zr_MAT1-P1_5	470	213	0.453191		0.079	0.0031	2.069	0.11	0.1904	0.0072	0.0401	0.0062	0.88284		1123	39	1143	35	1165	80	1123	39		1.74978
Zr_MAT1-P1_22	1029	221.1	0.214869		0.08098	0.003	2.13	0.082	0.1917	0.0037	0.0546	0.0029	0.29446		1130.6	20	1159.4	27	1218	74	1130.6	20		2.48404
Zr_MAT1-P1_1	415	107.6	0.259277		0.0779	0.003	2.171	0.084	0.2011	0.004	0.0606	0.0033	0.070384		1181.3	21	1172.7	26	1146	73	1181.3	21		-0.73335
Zr_MAT1-P1_9	306	99.6	0.32549		0.0779	0.0032	2.166	0.089	0.2026	0.004	0.0602	0.0032	0.11257		1189.1	21	1169	29	1148	78	1189.1	21		-1.71942
Zr_MAT1-P1_13	107.6	153.3	1.42472		0.0787	0.0038	2.26	0.13	0.2044	0.0072	0.05817	0.003	0.66794		1198	38	1196	42	1181	85	1198	38		-0.167224
Zr_MAT1-P1_21	550	60	0.109091		0.0783	0.003	2.235	0.093	0.2054	0.0047	0.0642	0.0041	0.53586		1204	25	1191	29	1151	76	1204	25		-1.09152
Zr_MAT1-P1_14	197	51.6	0.261929		0.0791	0.0033	2.235	0.093	0.2071	0.0042	0.0631	0.0036	0.22546		1213	22	1193	30	1172	84	1213	22		-1.67645
Zr_MAT1-P1_12	158	62.2	0.393671		0.0825	0.0037	2.391	0.11	0.2094	0.0044	0.0655	0.0039	0.34084		1225	24	1238	33	1256	85	1225	24		1.05008
Zr_MAT1-P1_6	400	107.7	0.26925		0.0812	0.0032	2.376	0.097	0.2101	0.0043	0.0625	0.0033	0.36887		1229	23	1234	29	1237	75	1229	23		0.405186
Zr_MAT1-P1_29	223	65.5	0.293722		0.0803	0.0032	2.358	0.096	0.2113	0.0042	0.0631	0.0035	0.30774		1235.7	22	1229	29	1199	78	1235.7	22		-0.545159
Zr_MAT1-P1_33	434	127.6	0.294009		0.08177	0.003	2.399	0.094	0.2131	0.0042	0.0613	0.0033	0.44509		1245.2	22	1241.9	28	1238	74	1245.2	22		-0.265722
Zr_MAT1-P1_11	260	81.1	0.311923		0.0814	0.0034	2.414	0.1	0.2145	0.0046	0.0621	0.0035	0.30732		1253	24	1251	29	1223	82	1253	24		-0.159872
Zr_MAT1-P1_15	241	74.3	0.308299		0.0812	0.0034	2.424	0.11	0.2156	0.0046	0.064	0.0034	0.33027		1258	25	1248	32	1216	84	1258	25		-0.801282
Zr_MAT1-P1_19	267	107.1	0.401124		0.0789	0.0032	2.376	0.097	0.2171	0.0044	0.0634	0.0034	0.14347		1266	23	1236	28	1163	80	1266	23		-2.42718
Zr_MAT1-P1_17	296	60.1	0.203041		0.0804	0.0035	2.418	0.11	0.2178	0.0049	0.064	0.0042	0.38393		1270	26	1247	33	1211	81	1270	26		-1.84443
Zr_MAT1-P1_35	327	84.9	0.259633		0.0811	0.0032	2.445	0.098	0.2179	0.0043	0.0643	0.0034	0.21148		1271	23	1255	29	1223	80	1271	23		-1.2749
Zr_MAT1-P1_34	204	66.7	0.326961		0.0793	0.0035	2.414	0.11	0.2181	0.0043	0.0646	0.0037	0.25348		1271.6	23	1245	33	1180	91	1271.6	23		-2.13655
Zr_MAT1-P1_26	270	55.5	0.205556		0.0784	0.0033	2.478	0.11	0.2287	0.0048	0.0612	0.0043	-0.021215		1328	25	1268	30	1163	92	1328	25		-4.73186
Zr_Mat3v2_20	878	430	0.489749		0.0557	0.0032	0.335	0.022	0.04361	0.00094	0.01453	0.0011	0.37598		275.1	5.8	293	17	430	130	275.1	5.8		6.10922
Zr_Mat3v2_12	710	352.7	0.496761		0.0573	0.003	0.348	0.02	0.04372	0.00086	0.01444	0.001	0.16757		275.8	5.3	303.3	15	491	110	275.8	5.3		9.06693
Zr_Mat3v2_25	1094.4	863	0.78856		0.0568	0.0027	0.3427	0.018	0.0438	0.00082	0.01392	0.00091	0.063961		276.4	5.1	300.2	13	475	100	276.4	5.1		7.92805
Zr_Mat3v2_30	591	310	0.524535		0.0538	0.0035	0.328	0.023	0.04454	0.0008	0.01436	0.0011	0.12963		280.9	5	288	17	370	130	280.9	5		2.46528
Zr_Mat3v2_29	364	151	0.414835		0.0636	0.0039	0.381	0.032	0.0448	0.0025	0.01665	0.0013	0.41986		282	15	327	23	740	150	282	15		13.7615
Zr_Mat3v2_26	827.6	385.9	0.466288		0.0553	0.0028	0.3402	0.019	0.04474	0.00074	0.01428	0.001	-0.085351		282.1	4.6	298.4	15	421	110	282.1	4.6		5.46247
Zr_Mat3v2_13	671	285	0.424739		0.0562	0.0038	0.344	0.024	0.04478	0.00085	0.01459	0.0011	0.046617		282.4	5.2	300	18	440	150	282.4	5.2		5.86667
Zr_Mat3v2_31	748	353	0.471925		0.0616	0.0038	0.384	0.029	0.04479	0.001	0.01574	0.0012	0.45605		282.5	6.3	329	21	670	140	282.5	6.3		14.1337
Zr_Mat3v2_3	534	213.9	0.400562		0.0758	0.0041	0.473	0.03	0.04487	0.00079	0.0217	0.0017	0.18956		283	4.9	393	21	1105	89	283	4.9		27.9898
Zr_Mat3v2_7	308	152.6	0.495455		0.0576	0.0039	0.357	0.027	0.04499	0.00093	0.01462	0.0011	0.22436		283.7	5.7	313	19	520	140	283.7	5.7		9.36102
Zr_Mat3v2_24	733	514	0.701228		0.0585	0.0033	0.364	0.024	0.04513	0.00077	0.01512	0.001	0.15799		284.5	4.8	317	19	580	120	284.5	4.8		10.2524
Zr_Mat3v2_4	767	700	0.912647		0.0531	0.0031	0.327	0.019	0.04519	0.00095	0.01404	0.00098	-0.05221		284.9	5.8	287.2	15	340	140	284.9	5.8		0.800836
Zr_Mat3v2_33	1028	1023	0.995136		0.0645	0.003	0.3982	0.021	0.04523	0.00064	0.01447	0.00096	0.14211		285.2	4	340.2	15	751	97	285.2	4		16.167
Zr_Mat3v2_10	660.4	350.2	0.530285		0.0561	0.0033	0.35	0.021	0.04529	0.00086	0.01479	0.0011	0.064757		285.5	5.3	304.1	16	460	130	285.5	5.3		6.11641
Zr_Mat3v2_17	526	164.2	0.312167		0.0554	0.0037	0.343	0.023	0.04529	0.00081	0.01698	0.0014	-0.24691		285.5	5	299	18	410	150	285.5	5		4.51505
Zr_Mat3v2_21	491.8	218.3	0.44388		0.0581	0.0032	0.363	0.024	0.04531	0.00084	0.01592	0.0012	0.23691		285.6	5.2	314	18	542	130	285.6	5.2		9.04459
Zr_Mat3v2_28	612	451.2	0.737255		0.0583	0.0035	0.368	0.023	0.04547	0.00086	0.01476	0.00097	-0.0037166		286.7	5.3	318	17	522	130	286.7	5.3		9.84277
Zr_Mat3v2_27	446.7	336.5	0.753302		0.0553	0.0034	0.34	0.024	0.0455	0.00076	0.01441	0.001	0.23473		286.8	4.7	299	17	410	140	286.8	4.7		4.08027
Zr_Mat3v2_32	1131	862	0.762157		0.0557	0.0028	0.348	0.02	0.04552	0.00074	0.01416	0.00095	0.13124		286.9	4.5	303.2	15	450	100	286.9	4.5		5.37599
Zr_Mat3v2_2	855	651	0.761404		0.0622	0.0032	0.389	0.022	0.04553	0.00071	0.01531	0.001	0.10221		287	4.4	333.1	16	672	120	287	4.4		13.8397
Zr_Mat3v2_34	684	439	0.641813		0.0542	0.0034	0.337	0.022	0.04559	0.00095	0.0144	0.00099	-0.060148		287.4	5.8	295	17	360	140	287.4	5.8		2.57627
Zr_Mat3v2_22	1052	599.8	0.570152		0.0543	0.0028	0.337	0.02	0.04563	0.0007	0.01439	0.00096	0.088718		287.6	4.3	295	15	383	120	287.6	4.3		2.50847
Zr_Mat3v2_9	952	962	1.0105		0.0562	0.0036	0.359	0.026	0.04565	0.00073	0.01415	0.00093	-0.031102		287.7	4.5	311	19	480	160	287.7	4.5		7.49196
Zr_Mat3v2_35	829	726	0.875754		0.0527	0.0031	0.331	0.022	0.0457	0.00084	0.01406	0.00094	0.24081		288.1	5.2	290	17	304	130	288.1	5.2		0.655172
Zr_Mat3v2_5	808.2	424.9	0.525736		0.0563	0.0035	0.349	0.022	0.04574	0.00092	0.01437	0.001	-0.20375		288.3	5.7	306	18	440	140	288.3	5.7		5.78431
Zr_Mat3v2_6	389.1	244	0.627088		0.0641	0.0043	0.4	0.027	0.04574	0.001	0.01639	0.0012	0.04435		288.3	6.3	343	21	730	130	288.3	6.3		15.9475
Zr_Mat3v2_15	583	250	0.428816		0.0614	0.0034	0.384	0.026	0.04575	0.00078	0.01786	0.0013	0.46948		288.4	4.8	330	19	662	110	288.4	4.8		12.6061
Zr_Mat3v2_23	596	372	0.624161		0.0581	0.0036	0.366	0.024	0.04577	0.00091	0.01541	0.0011	-0.18342		288.5	5.6	316	18	510	140	288.5	5.6		8.70253
Zr_Mat3v2_19	791	443.8	0.561062		0.0531	0.003	0.335	0.021	0.04583	0.00079	0.01399	0.00093	-0.02748		288.9	4.9	292.8	16	315	130	288.9	4.9		1.33197
Zr_Mat3v2_16	501	287	0.572854		0.0592	0.004	0.376	0.026	0.04628	0.00088	0.01559	0.0011	-0.14779		291.7	5.4	323	19	540	150	291.7	5.4		9.6904
Zr_Mat3v2_14	558	219.1	0.392652		0.0537	0.0037	0.35	0.026	0.04635	0.0009	0.01485	0.001	0.16823		292.1	5.6	304	19	360	160	292.1	5.6		3.91447
Zr_Mat3v2_18	352	213	0.605114		0.0573	0.0036	0.368	0.025	0.0466	0.0013	0.01546	0.0012	0.38934		293.7	8.1	321	17	480	140	293.7	8.1		8.50467
Zr_Mat3v2_8	381	117	0.307087		0.0641	0.0036	0.41	0.024	0.04668	0.00093	0.01841	0.0014	-0.0067794		294.1	5.7	350	19	749	120	294.1	5.7		15.9714
Zr_Mat3v2_11	317.8	43.4	0.136564		0.075	0.0038	1.657	0.097	0.1623	0.003	0.0536	0.0045	0.50061		970	17	991	37	1060	100	970	17		2.11907
Zr_Mat3v2_1	223	71.7	0.321525		0.0843	0.0038	2.56	0.13	0.2195	0.0034	0.0691	0.0048	0.14737		1279	18	1288	38	1298	89	1279	18		0.698758
Zr_MAT3FA4_1	77.2	15.64	0.202591		0.0507	0.0048	0.298	0.027	0.0416	0.0015	0.0162	0.002	0.038455		262.6	9.5	263	21	250	200	262.6	9.5		0.152091
Zr_MAT3FA4_26	655	52.7	0.080458		0.0525	0.0027	0.318	0.015	0.04373	0.00097	0.01345	0.0011	-0.042622		275.9	6	280	12	297	120	275.9	6		1.46429
Zr_MAT3FA4_9	581	403	0.693632		0.0517	0.0023	0.312	0.015	0.04383	0.001	0.0135	0.00074	0.32922		276.5	6.3	275.4	12	267	100	276.5	6.3		-0.399419
Zr_MAT3FA4_14	391	182.7	0.467263		0.0513	0.0026	0.3128	0.015	0.0441	0.00098	0.01399	0.00081	0.031278		278.2	6	276	12	248	110	278.2	6		-0.797101
Zr_MAT3FA4_13	304	61.7	0.202961		0.0512	0.0031	0.311	0.018	0.04423	0.001	0.01565	0.001	0.00038055		279	6.3	274	14	250	130	279	6.3		-1.82482
Zr_MAT3FA4_7	214	92.7	0.433178		0.0517	0.0038	0.319	0.022	0.04484	0.001	0.01539	0.001	-0.13828		282.8	6.4	280	17	220	150	282.8	6.4		-1
Zr_MAT3FA4_35	991	159	0.160444		0.0576	0.0026	0.3564	0.016	0.04532	0.00098	0.01736	0.0011	0.034189		285.7	6	309.3	12	506	98	285.7	6		7.63013
Zr_MAT3FA4_23	666	478	0.717718		0.0517	0.0022	0.3258	0.014	0.04539	0.00093	0.01409	0.00076	0.23379		286.1	5.7	286.2	11	280	96	286.1	5.7		0.0349406
Zr_MAT3FA4_20	76.8	35.6	0.463542		0.0509	0.0046	0.324	0.03	0.0461	0.0019	0.0155	0.0015	0.15142		292	12	282	23	210	180	292	12		-3.5461
Zr_MAT3FA4_28	133.3	48.3	0.362341		0.0517	0.0038	0.331	0.024	0.0464	0.0012	0.0152	0.0013	0.047971		292.3	7.7	291	18	270	150	292.3	7.7		-0.446735
Zr_MAT3FA4_30	86.8	42.1	0.485023		0.0578	0.0041	0.711	0.05	0.0898	0.0021	0.0287	0.0021	0.035565		554	13	544	29	460	160	554	13		-1.83824
Zr_MAT3FA4_10	484	130	0.268595		0.078	0.0034	1.739	0.073	0.1618	0.0034	0.0302	0.0026	0.064528		966.5	19	1023	27	1143	86	966.5	19		5.52297
Zr_MAT3FA4_4	109	61.6	0.565138		0.0741	0.0042	1.631	0.096	0.1632	0.0037	0.0496	0.0032	0.12859		974	20	979	37	1038	110	974	20		0.510725
Zr_MAT3FA4_24	623	114.8	0.18427		0.0728	0.0028	1.669	0.068	0.1671	0.0034	0.0511	0.0028	0.52496		996.3	19	998	26	1004	78	996.3	19		0.170341
Zr_MAT3FA4_16	314	138	0.43949		0.0704	0.0029	1.637	0.067	0.168	0.0033	0.051	0.0027	0.043126		1000.9	18	985	25	944	88	1000.9	18		-1.61421
Zr_MAT3FA4_17	764	176.5	0.231021		0.0722	0.0028	1.669	0.068	0.1681	0.0033	0.04932	0.0026	0.3641		1001.3	18	998	25	995	74	1001.3	18		-0.330661
Zr_MAT3FA4_12	469	95.5	0.203625		0.0717	0.0028	1.668	0.066	0.1683	0.0033	0.0507	0.0029	0.28847		1002.4	18	997.5	24	974	79	1002.4	18		-0.491228
Zr_MAT3FA4_2	104.8	31.85	0.303912		0.074	0.0036	1.751	0.087	0.1711	0.0043	0.0518	0.0037	0.25839		1018	24	1025	33	1036	98	1018	24		0.682927
Zr_MAT3FA4_5	74.6	26.3	0.352547		0.0724	0.0035	1.709	0.086	0.173	0.004	0.0537	0.0039	0.36972		1028	22	1013	34	990	100	1028	22		-1.48075
Zr_MAT3FA4_19	339	86.1	0.253982		0.0744	0.0029	1.805	0.083	0.1768	0.0054	0.0537	0.0033	0.78347		1049	30	1046	30	1048	78	1049	30		-0.286807
Zr_MAT3FA4_27	667	179.8	0.269565		0.07747	0.0029	1.986	0.077	0.1851	0.0036	0.0561	0.0029	0.21209		1094.5	20	1110.4	26	1133	78	1094.5	20		1.43192
Zr_MAT3FA4_32	88.2	40.06	0.454195		0.0752	0.0036	1.929	0.088	0.1865	0.0045	0.0569	0.0034	0.1325		1102	24	1090	30	1057	95	1102	24		-1.10092
Zr_MAT3FA4_21	399	77.7	0.194737		0.0762	0.0032	2.007	0.092	0.1909	0.005	0.0578	0.0033	0.63825		1126	27	1119	30	1100	83	1126	27		-0.625559
Zr_MAT3FA4_18	110.5	43.4	0.39276		0.0775	0.0039	2.044	0.098	0.1939	0.0041	0.0601	0.0036	0.057652		1142	22	1131	34	1114	97	1142	22		-0.972591
Zr_MAT3FA4_31	111.2	42.8	0.384892		0.0779	0.0035	2.153	0.096	0.2011	0.0044	0.0604	0.0036	-0.06973		1181	23	1167	32	1132	91	1181	23		-1.19966
Zr_MAT3FA4_25	53.9	30.1	0.558442		0.0783	0.0045	2.191	0.12	0.2016	0.0053	0.0613	0.0039	0.11878		1184	28	1178	38	1123	110	1184	28		-0.509338
Zr_MAT3FA4_8	55.3	30.9	0.55877		0.0778	0.0044	2.125	0.11	0.2026	0.005	0.0587	0.0039	0.15116		1189	27	1153	38	1127	120	1189	27		-3.12229
Zr_MAT3FA4_15	588	85.5	0.145408		0.0774	0.0029	2.178	0.085	0.203	0.0038	0.0543	0.0029	0.012387		1191.3	21	1173.7	27	1129	75	1191.3	21		-1.49953
Zr_MAT3FA4_6	261	90	0.344828		0.0813	0.0032	2.35	0.095	0.2093	0.0042	0.0615	0.0034	0.13544		1225	22	1226	29	1227	81	1225	22		0.0815661
Zr_MAT3FA4_29	217.2	63.7	0.293278		0.0807	0.0033	2.365	0.1	0.2116	0.0043	0.0649	0.0037	0.26449		1237	23	1230	30	1212	83	1237	23		-0.569106
Zr_MAT3FA4_22	253	73.1	0.288933		0.0807	0.0033	2.368	0.11	0.2122	0.0053	0.0588	0.0033	0.73384		1240	28	1234	35	1207	81	1240	28		-0.486224
Zr_MAT3FA4_11	452	142	0.314159		0.08179	0.0031	2.438	0.097	0.2159	0.0045	0.0648	0.0034	0.4447		1260	24	1253	28	1241	71	1260	24		-0.558659
Zr_MAT3FA4_33	121.4	43	0.354201		0.0815	0.0037	2.43	0.11	0.2171	0.0048	0.0634	0.0037	-0.1918		1266	25	1252	31	1222	89	1266	25		-1.11821
Zr_MAT3FA4_3	140	49	0.35		0.0831	0.0035	2.477	0.11	0.2175	0.0044	0.0654	0.0036	0.19226		1268	23	1264	31	1261	83	1268	23		-0.316456
Zr_MAT3FA4_34	142.7	57.4	0.402242		0.0906	0.0039	3.104	0.14	0.2457	0.0055	0.0783	0.0043	0.50661		1416	29	1431	35	1447	81	1447	81		1.04822
Zr_MAT3P5_30	129.8	90.6	0.697997		0.0708	0.0054	0.428	0.03	0.0432	0.0013	0.01419	0.00087	-0.35833		272.6	7.9	362	22	950	150	272.6	7.9		24.6961
Zr_MAT3P5_21	161.5	80.9	0.500929		0.0529	0.0038	0.315	0.022	0.04323	0.0012	0.01275	0.0011	0.023794		272.8	7.5	277	17	280	150	272.8	7.5		1.51625
Zr_MAT3P5_5	99	41.5	0.419192		0.0554	0.0041	0.34	0.024	0.0434	0.0013	0.01337	0.0011	0.12945		273.6	7.8	296	18	430	150	273.6	7.8		7.56757
Zr_MAT3P5_4	262.7	126.4	0.481157		0.0521	0.0028	0.314	0.016	0.04366	0.00094	0.01382	0.00081	0.034678		276	6	277.1	13	268	120	276	6		0.396969
Zr_MAT3P5_7	241	124	0.514523		0.0531	0.0031	0.321	0.019	0.0438	0.00099	0.01363	0.0009	0.079192		276.3	6.1	282	15	320	130	276.3	6.1		2.02128
Zr_MAT3P5_2	286	121.9	0.426224		0.0555	0.0029	0.338	0.017	0.04385	0.00098	0.0136	0.00089	0.085886		276.7	6.1	295.1	13	416	110	276.7	6.1		6.23517
Zr_MAT3P5_18	708	337	0.475989		0.0518	0.0024	0.3138	0.015	0.04404	0.00086	0.01388	0.00081	0.058557		277.8	5.3	276.8	12	270	110	277.8	5.3		-0.361272
Zr_MAT3P5_12	479	289.2	0.603758		0.0522	0.0026	0.318	0.016	0.04406	0.00094	0.01349	0.00078	0.0032553		277.9	5.8	279.9	12	290	110	277.9	5.8		0.714541
Zr_MAT3P5_22	355	180	0.507042		0.0532	0.0029	0.324	0.018	0.04409	0.001	0.01447	0.00085	-0.099337		278.1	6.3	284.6	13	307	120	278.1	6.3		2.28391
Zr_MAT3P5_32	272.9	141.1	0.517039		0.0523	0.003	0.318	0.018	0.04414	0.001	0.0122	0.00072	-0.031889		278.5	6.3	280	14	290	130	278.5	6.3		0.535714
Zr_MAT3P5_3	245.2	97.3	0.396819		0.0539	0.0034	0.332	0.021	0.04422	0.00098	0.01446	0.001	0.26732		279	6.1	292	15	390	130	279	6.1		4.45205
Zr_MAT3P5_14	212.5	84.9	0.399529		0.0523	0.0033	0.319	0.021	0.04423	0.001	0.01375	0.00095	0.053952		279	6.2	280	16	260	140	279	6.2		0.357143
Zr_MAT3P5_11	190.6	79.4	0.416579		0.0513	0.0032	0.321	0.019	0.04428	0.0011	0.01392	0.00099	0.00069867		279.3	6.7	282	15	270	120	279.3	6.7		0.957447
Zr_MAT3P5_29	95.8	62.5	0.652401		0.0536	0.0041	0.328	0.025	0.04439	0.0012	0.01338	0.001	0.038123		280	7.2	286	20	330	180	280	7.2		2.0979
Zr_MAT3P5_8	394	225	0.571066		0.0533	0.0028	0.325	0.017	0.04446	0.0011	0.01393	0.00078	0.26382		280.4	6.5	285	13	333	110	280.4	6.5		1.61404
Zr_MAT3P5_28	258.7	165.6	0.640124		0.0554	0.0034	0.338	0.02	0.04454	0.0011	0.0142	0.00088	0.057745		280.9	6.6	295	15	400	130	280.9	6.6		4.77966
Zr_MAT3P5_23	248.7	116.8	0.469642		0.054	0.003	0.327	0.018	0.04459	0.0011	0.01373	0.00086	0.2034		281.2	6.7	287	14	358	120	281.2	6.7		2.02091
Zr_MAT3P5_26	328.9	130.5	0.396777		0.0531	0.0028	0.323	0.017	0.04463	0.0011	0.01414	0.00096	0.12085		281.4	6.5	283.6	13	333	120	281.4	6.5		0.77574
Zr_MAT3P5_19	476	286	0.60084		0.0532	0.0035	0.325	0.023	0.04471	0.0011	0.01463	0.00093	0.29675		282	6.7	285	17	300	150	282	6.7		1.05263
Zr_MAT3P5_35	229	94.5	0.412664		0.0515	0.0037	0.321	0.024	0.04483	0.001	0.01456	0.00091	0.11527		282.7	6.2	283	18	270	150	282.7	6.2		0.106007
Zr_MAT3P5_1	173.2	93.5	0.539838		0.0561	0.0035	0.35	0.02	0.04477	0.0011	0.01495	0.001	0.1621		283	6.7	306	14	450	130	283	6.7		7.51634
Zr_MAT3P5_20	244	103.9	0.42582		0.0536	0.0035	0.332	0.022	0.04493	0.00098	0.01428	0.00092	-0.065543		283.3	6	290	17	330	150	283.3	6		2.31034
Zr_MAT3P5_9	426.1	280	0.657123		0.0531	0.0026	0.331	0.016	0.04495	0.00098	0.0143	0.00082	0.11956		283.5	6.1	291.3	12	326	110	283.5	6.1		2.67765
Zr_MAT3P5_15	173.3	70	0.403924		0.0526	0.0037	0.327	0.022	0.045	0.0013	0.01416	0.0011	0.040146		283.6	8	288	17	300	160	283.6	8		1.52778
Zr_MAT3P5_24	467	194.5	0.416488		0.051	0.0026	0.317	0.016	0.04501	0.001	0.01418	0.00085	-0.13145		283.8	6.3	279.1	12	222	110	283.8	6.3		-1.68398
Zr_MAT3P5_10	326	213	0.653374		0.0521	0.0033	0.32	0.02	0.04504	0.0012	0.01472	0.00087	0.089705		284	7.3	285	15	260	140	284	7.3		0.350877
Zr_MAT3P5_25	235.8	110.5	0.468617		0.0548	0.003	0.34	0.019	0.04507	0.00098	0.01504	0.0011	0.013942		284.2	6	297	14	380	120	284.2	6		4.30976
Zr_MAT3P5_33	134	57.5	0.429104		0.0519	0.0044	0.322	0.025	0.0453	0.0013	0.0154	0.0014	0.032442		285.5	8.3	286	20	270	180	285.5	8.3		0.174825
Zr_MAT3P5_27	202	78.7	0.389604		0.0539	0.0033	0.338	0.021	0.04526	0.0011	0.01564	0.001	-0.096708		286.2	7.2	299	15	350	140	286.2	7.2		4.28094
Zr_MAT3P5_31	283	143	0.5053		0.0527	0.0032	0.336	0.02	0.04548	0.0012	0.0142	0.00099	-0.076345		286.7	7.4	293	15	310	140	286.7	7.4		2.15017
Zr_MAT3P5_17	87	43.8	0.503448		0.0533	0.0049	0.33	0.029	0.0455	0.0015	0.014	0.0013	0.006646		287	9.3	288	22	300	200	287	9.3		0.347222
Zr_MAT3P5_16	226	105.8	0.468142		0.0518	0.0033	0.324	0.02	0.04555	0.0011	0.01609	0.0012	-0.11642		287.1	6.6	284	15	260	140	287.1	6.6		-1.09155
Zr_MAT3P5_34	302	124.6	0.412583		0.0514	0.0028	0.325	0.017	0.04605	0.001	0.01467	0.00096	0.014649		290.2	6.3	286.6	13	250	120	290.2	6.3		-1.25611
Zr_MAT3P5_13	154.7	23.9	0.154493		0.0595	0.004	0.382	0.026	0.04658	0.0012	0.0208	0.0021	-0.087654		293.4	7.3	330	18	600	130	293.4	7.3		11.0909
Zr_MAT3P5_6	81.8	30.8	0.376528		0.074	0.0033	1.833	0.083	0.1783	0.0039	0.0555	0.0032	0.046501		1058	21	1055	30	1036	88	1058	21		-0.28436
Zr_M4F20_18	371	244	0.657682		0.0546	0.0031	0.322	0.019	0.04324	0.00092	0.01369	0.00094	-0.13252		272.9	5.7	284.8	14	375	130	272.9	5.7		4.17837
Zr_M4F20_13	360	160	0.444444		0.0531	0.003	0.314	0.019	0.0433	0.00084	0.01397	0.0011	0.09544		273.2	5.2	276.7	15	314	130	273.2	5.2		1.26491
Zr_M4F20_20	303	123	0.405941		0.0543	0.0034	0.328	0.021	0.04357	0.0008	0.01391	0.0011	-0.16614		274.9	5	288	16	380	140	274.9	5		4.54861
Zr_M4F20_35	643	700	1.08865		0.0524	0.0026	0.3145	0.018	0.04383	0.00065	0.01328	0.00089	0.12398		276.5	4	278.5	13	308	120	276.5	4		0.718133
Zr_M4F20_25	464.3	377	0.811975		0.0514	0.003	0.317	0.02	0.04389	0.00073	0.01337	0.00094	-0.048594		276.9	4.5	279	16	254	130	276.9	4.5		0.752688
Zr_M4F20_27	495.5	385.6	0.778204		0.0513	0.0028	0.311	0.019	0.04398	0.00073	0.01309	0.00089	-0.068718		277.4	4.5	274.7	14	251	120	277.4	4.5		-0.98289
Zr_M4F20_34	416.2	351	0.843345		0.0512	0.0028	0.314	0.019	0.0441	0.00068	0.01333	0.0009	-0.26603		278.2	4.2	278.1	14	254	120	278.2	4.2		-0.0359583
Zr_M4F20_10	566	566	1		0.0523	0.0028	0.32	0.019	0.04415	0.0008	0.01356	0.00093	0.26547		278.5	4.9	281.3	15	281	120	278.5	4.9		0.995379
Zr_M4F20_29	489	429	0.877301		0.0525	0.0027	0.32	0.019	0.04422	0.00075	0.01336	0.00093	-0.068333		278.9	4.6	281.7	14	302	120	278.9	4.6		0.993965
Zr_M4F20_33	645.1	605	0.937839		0.052	0.0027	0.322	0.019	0.04429	0.00078	0.01345	0.00089	0.34852		279.3	4.8	283	14	278	120	279.3	4.8		1.30742
Zr_M4F20_11	296.8	113	0.380728		0.058	0.0041	0.35	0.026	0.04439	0.00096	0.01459	0.0011	0.12296		280	5.9	306	20	530	140	280	5.9		8.49673
Zr_M4F20_14	247	87.3	0.353441		0.0544	0.0039	0.329	0.024	0.0444	0.001	0.01386	0.0012	-0.029606		280	6.4	291	18	350	160	280	6.4		3.78007
Zr_M4F20_24	306.2	133.1	0.434683		0.0527	0.0033	0.325	0.021	0.04441	0.00085	0.01409	0.0011	0.075042		280.1	5.2	289	16	340	140	280.1	5.2		3.07958
Zr_M4F20_28	379	226	0.596306		0.0571	0.004	0.353	0.027	0.04461	0.0011	0.01545	0.0011	0.16864		281.3	6.8	306	21	470	150	281.3	6.8		8.0719
Zr_M4F20_2	330.7	165.5	0.500454		0.0522	0.0029	0.319	0.02	0.04466	0.00083	0.01356	0.001	-0.027596		281.6	5.1	281.8	15	276	120	281.6	5.1		0.0709723
Zr_M4F20_9	535.3	365.2	0.682234		0.0544	0.0033	0.333	0.022	0.04468	0.00081	0.01476	0.0011	-0.15044		281.8	5	291	17	370	140	281.8	5		3.16151
Zr_M4F20_3	326.7	218.4	0.668503		0.0525	0.0032	0.321	0.021	0.04472	0.00081	0.01399	0.00099	-0.0032781		282	5	282	16	280	130	282	5		0
Zr_M4F20_17	383.9	286	0.744986		0.0566	0.0035	0.351	0.024	0.04479	0.00084	0.01336	0.00096	0.085845		282.5	5.2	305	18	460	140	282.5	5.2		7.37705
Zr_M4F20_15	401.8	234.2	0.582877		0.0533	0.0028	0.328	0.02	0.04482	0.00077	0.01363	0.00092	0.058218		282.7	4.7	287.9	15	333	120	282.7	4.7		1.80618
Zr_M4F20_16	417.5	231	0.553293		0.0518	0.0027	0.324	0.019	0.04485	0.0007	0.01386	0.00095	0.064492		282.8	4.3	284.4	15	270	120	282.8	4.3		0.562588
Zr_M4F20_26	400	202.5	0.50625		0.0546	0.0034	0.34	0.023	0.04488	0.00078	0.01402	0.001	0.12095		283	4.8	298	17	410	140	283	4.8		5.03356
Zr_M4F20_19	274	144.4	0.527007		0.0559	0.0046	0.347	0.029	0.045	0.0011	0.01383	0.0012	0.031353		283.6	7	301	22	420	180	283.6	7		5.78073
Zr_M4F20_12	419.2	319	0.760973		0.0574	0.0037	0.352	0.023	0.04489	0.0008	0.01391	0.00095	-0.063127		283.7	4.7	308	17	510	130	283.7	4.7		7.88961
Zr_M4F20_5	416.1	368	0.884403		0.0519	0.0026	0.3203	0.018	0.04506	0.00076	0.01352	0.00093	-0.014591		284.1	4.7	281.8	14	264	120	284.1	4.7		-0.816182
Zr_M4F20_7	397	275	0.692695		0.0515	0.0027	0.3204	0.018	0.04513	0.0009	0.01387	0.00096	0.23139		284.5	5.5	283.1	14	246	120	284.5	5.5		-0.494525
Zr_M4F20_4	336.4	231	0.686683		0.0533	0.0032	0.326	0.02	0.04514	0.00075	0.01366	0.00094	-0.088982		284.6	4.6	286	16	310	130	284.6	4.6		0.48951
Zr_M4F20_31	373	313	0.839142		0.0533	0.003	0.331	0.021	0.04513	0.00094	0.01392	0.00096	0.31807		284.6	5.8	290.3	16	340	130	284.6	5.8		1.96349
Zr_M4F20_21	272	155.5	0.571691		0.0533	0.0036	0.334	0.024	0.04518	0.00078	0.01367	0.00098	-0.26389		284.8	4.8	293	17	350	160	284.8	4.8		2.79863
Zr_M4F20_22	274	136.2	0.49708		0.0537	0.0031	0.333	0.021	0.04534	0.00087	0.01539	0.0011	0.11861		285.9	5.4	291	16	376	140	285.9	5.4		1.75258
Zr_M4F20_6	361	193.5	0.536011		0.0512	0.003	0.318	0.021	0.04538	0.00095	0.01406	0.001	0.32671		286.1	5.9	280	16	246	130	286.1	5.9		-2.17857
Zr_M4F20_32	318	216.5	0.680818		0.059	0.0039	0.371	0.025	0.04573	0.00085	0.01518	0.0011	-0.051907		288.2	5.2	319	19	520	140	288.2	5.2		9.65517
Zr_M4F20_8	384.2	264	0.687142		0.0543	0.003	0.345	0.02	0.04581	0.00099	0.01497	0.0011	0.034224		288.7	6.1	300.8	15	387	130	288.7	6.1		4.02261
Zr_M4F20_30	1051	205.1	0.195147		0.0789	0.0034	2.177	0.11	0.201	0.0029	0.06	0.004	0.098514		1180.7	16	1173.5	35	1166	87	1180.7	16		-0.613549
Zr_M4F20_1	698	252.5	0.361748		0.08123	0.0034	2.466	0.12	0.2174	0.0033	0.0636	0.0042	0.20489		1268	18	1261.6	36	1232	89	1268	18		-0.507292
Zr_M4F20_23	254	91.4	0.359843		0.0823	0.0037	2.445	0.13	0.218	0.0034	0.0627	0.0043	0.081697		1271	18	1262	39	1245	90	1271	18		-0.713154
Zr_M4Q1_6	774	719	0.93		0.0708	0.006	0.412	0.015	0.043	0.0008	0.015	0.0006	-0.07		271.1	4.9	352	11	946	190	271.1	4.9		23
Zr_M4Q1_2	364.4	233.8	0.64		0.0622	0.0066	0.372	0.019	0.043	0.0017	0.0173	0.001	0.02		271.2	11	328	14	720	210	271.2	11		17.3
Zr_M4Q1_8	499	321	0.64		0.0544	0.0049	0.323	0.013	0.0433	0.0007	0.0128	0.0006	0.26		273.2	4.2	284	10	381	210	273.2	4.2		3.8
Zr_M4Q1_29	668	596	0.89		0.0523	0.0024	0.313	0.013	0.0435	0.0009	0.0131	0.0007	0.36		274.6	5.6	276.1	10	309	110	274.6	5.6		0.5
Zr_M4Q1_12	705	654.9	0.93		0.0551	0.0048	0.331	0.011	0.0435	0.0006	0.0139	0.0006	0.04		274.7	3.9	290	8.6	399	200	274.7	3.9		5.3
Zr_M4Q1_13	608	468	0.77		0.0525	0.0046	0.3151	0.01	0.0438	0.0007	0.0139	0.0007	-0.1		276.6	4.4	277.8	8	289	200	276.6	4.4		0.4
Zr_M4Q1_25	96.7	20.59	0.21		0.0516	0.0043	0.323	0.023	0.0441	0.0013	0.0151	0.0015	-0.01		278.3	7.8	283	18	310	170	278.3	7.8		1.7
Zr_M4Q1_3	316	228	0.72		0.0516	0.0048	0.325	0.015	0.0442	0.0011	0.0139	0.0007	0.22		279.1	7	285	11	270	200	279.1	7		2.1
Zr_M4Q1_9	409.2	157.3	0.38		0.0549	0.0051	0.331	0.013	0.0443	0.0007	0.0145	0.0008	0.15		279.1	4.3	290	9.9	380	200	279.1	4.3		3.8
Zr_M4Q1_18	379	284.1	0.75		0.0528	0.0028	0.32	0.015	0.0443	0.0009	0.0136	0.0008	-0.06		279.6	5.8	280.9	12	289	120	279.6	5.8		0.5
Zr_M4Q1_28	578	305	0.53		0.0534	0.0027	0.327	0.015	0.0444	0.001	0.0133	0.0008	-0.32		279.8	6	287	11	330	99	279.8	6		2.5
Zr_M4Q1_26	255.4	177	0.69		0.0517	0.0031	0.316	0.017	0.0444	0.0012	0.0137	0.0009	-0.03		279.9	7.2	277.9	13	280	130	279.9	7.2		-0.7
Zr_M4Q1_22	346.3	165.9	0.48		0.053	0.0032	0.324	0.017	0.0444	0.001	0.0143	0.0008	-0.06		280	6	284	14	290	130	280	6		1.4
Zr_M4Q1_4	308.8	155.8	0.5		0.0545	0.0051	0.339	0.015	0.0444	0.0007	0.014	0.0008	-0.09		280.1	4.3	296	11	360	200	280.1	4.3		5.4
Zr_M4Q1_23	486	337	0.69		0.0518	0.0026	0.318	0.016	0.0445	0.001	0.0142	0.0008	0.29		280.7	6.3	279.6	12	275	120	280.7	6.3		-0.4
Zr_M4Q1_24	709	797	1.12		0.0529	0.0024	0.3221	0.014	0.0446	0.001	0.0137	0.0007	0.26		281	6	283.3	11	313	100	281	6		0.8
Zr_M4Q1_14	367	171	0.47		0.0519	0.0048	0.318	0.015	0.0446	0.0009	0.0137	0.0007	0.11		281.3	5.2	281	12	272	210	281.3	5.2		-0.1
Zr_M4Q1_16	465	397	0.85		0.0523	0.0026	0.32	0.014	0.0446	0.001	0.0137	0.0007	-0.07		281.5	6	281.6	11	279	110	281.5	6		0
Zr_M4Q1_32	496	352.6	0.71		0.0508	0.0028	0.317	0.017	0.0448	0.0012	0.0143	0.0008	0.03		282.4	7.1	279	13	215	120	282.4	7.1		-1.2
Zr_M4Q1_5	277.3	176.4	0.64		0.0518	0.0072	0.317	0.038	0.0449	0.001	0.0152	0.0012	-0.27		283.1	6.4	278	27	230	260	283.1	6.4		-1.8
Zr_M4Q1_15	188.5	61.2	0.32		0.054	0.0051	0.337	0.017	0.045	0.001	0.0135	0.001	0.16		283.6	6.1	294	13	360	210	283.6	6.1		3.5
Zr_M4Q1_33	305	173	0.57		0.0535	0.0035	0.331	0.02	0.0451	0.001	0.015	0.0009	-0.26		284.6	6.4	290	15	310	140	284.6	6.4		1.9
Zr_M4Q1_34	486	282.6	0.58		0.0531	0.0029	0.328	0.017	0.0452	0.001	0.0143	0.0008	-0.04		285	6.3	287.3	13	306	120	285	6.3		0.8
Zr_M4Q1_31	568	405	0.71		0.0491	0.0026	0.312	0.016	0.0453	0.0011	0.014	0.0008	-0.07		285.7	6.5	275.3	12	158	120	285.7	6.5		-3.8
Zr_M4Q1_30	160.3	50	0.31		0.052	0.0031	0.324	0.016	0.0454	0.0013	0.0163	0.0013	0.19		285.9	7.8	283	13	260	130	285.9	7.8		-1
Zr_M4Q1_7	176.4	86.2	0.49		0.0557	0.0069	0.342	0.028	0.0454	0.0012	0.0205	0.0014	0.31		286	7.4	297	21	390	210	286	7.4		3.7
Zr_M4Q1_17	141	59	0.42		0.0517	0.0034	0.332	0.02	0.0462	0.0011	0.0163	0.0011	0.06		291.2	6.9	292	16	260	140	291.2	6.9		0.3
Zr_M4Q1_1	156.8	100.5	0.64		0.0673	0.0081	0.427	0.032	0.0467	0.0009	0.017	0.0012	-0.35		294.5	5.7	360	22	820	230	294.5	5.7		18.2
Zr_M4Q1_10	963.9	210.1	0.22		0.0791	0.0066	1.952	0.046	0.1805	0.0024	0.0539	0.0023	0.26		1069.7	13	1099	16	1171	170	1069.7	13		2.7
Zr_M4Q1_27	318	123	0.39		0.076	0.0031	1.882	0.072	0.1816	0.0037	0.0549	0.0029	0.51		1075	20	1078	26	1095	87	1075	20		0.3
Zr_M4Q1_21	115.5	26.4	0.23		0.0757	0.0035	1.912	0.085	0.1851	0.0047	0.0567	0.0041	-0.06		1094	25	1083	28	1089	91	1094	25		-1
Zr_M4Q1_35	218.6	113.3	0.52		0.0795	0.0036	2.077	0.084	0.1931	0.0043	0.0605	0.0032	0.35		1138	23	1145	28	1182	88	1138	23		0.6
Zr_M4Q1_19	340	63.9	0.19		0.0783	0.0033	2.107	0.081	0.1959	0.0042	0.0585	0.0034	0.36		1153	23	1150	27	1154	86	1153	23		-0.3
Zr_M4Q1_20	503	154.2	0.31		0.0785	0.0031	2.223	0.082	0.2065	0.0043	0.0633	0.0032	0.51		1210	23	1188	25	1156	79	1210	23		-1.9
Zr_M4Q1_11	173.2	64.5	0.37		0.0827	0.0071	2.504	0.067	0.2184	0.0031	0.0661	0.0033	-0.04		1273	17	1275	20	1273	170	1273	17		0.2
Zr_M4CZ1_16	601	163.1	0.271381		0.0542	0.0026	0.3204	0.015	0.04294	0.00096	0.01419	0.00089	0.094401		271.6	5.7	281.9	12	361	110	271.6	5.7		3.65378
Zr_M4CZ1_13	345	169	0.489855		0.0526	0.0031	0.312	0.018	0.04312	0.0011	0.01318	0.00086	0.015333		272.1	6.9	275	14	280	130	272.1	6.9		1.05455
Zr_M4CZ1_17	603	151.1	0.25058		0.0517	0.0026	0.31	0.016	0.04375	0.00093	0.014	0.0008	0.099533		276	5.7	273.9	12	279	120	276	5.7		-0.766703
Zr_M4CZ1_1	322	144	0.447205		0.0518	0.003	0.315	0.019	0.04421	0.001	0.01413	0.00085	0.21503		278.9	6.5	277	15	250	130	278.9	6.5		-0.685921
Zr_M4CZ1_27	254.8	102.1	0.400706		0.0532	0.0033	0.325	0.02	0.04485	0.0011	0.01356	0.00086	0.069219		282.8	7	285	15	360	140	282.8	7		0.77193
Zr_M4CZ1_50	279	157.5	0.564516		0.0535	0.0042	0.331	0.027	0.0452	0.0013	0.01467	0.00095	0.25215		285.2	8.2	289	21	350	180	285.2	8.2		1.31488
Zr_M4CZ1_26	690	282	0.408696		0.0519	0.0024	0.3258	0.015	0.04545	0.00091	0.01409	0.00075	0.11505		286.5	5.6	286.1	12	279	99	286.5	5.6		-0.139811
Zr_M4CZ1_14	503	176.5	0.350895		0.0527	0.0024	0.3282	0.015	0.04548	0.00099	0.01405	0.0008	0.15194		286.7	6.1	287.9	11	320	110	286.7	6.1		0.416811
Zr_M4CZ1_45	498	153.6	0.308434		0.0517	0.0023	0.3376	0.016	0.04721	0.001	0.01515	0.00091	0.073944		297.4	6.3	295	12	266	110	297.4	6.3		-0.813559
Zr_M4CZ1_46	318.4	145.1	0.455716		0.0535	0.003	0.349	0.02	0.04738	0.001	0.01538	0.00091	-0.14849		298.4	6.1	303	15	314	120	298.4	6.1		1.51815
Zr_M4CZ1_25	490.6	429	0.874439		0.0533	0.0025	0.3561	0.016	0.04876	0.0011	0.01471	0.0008	0.20886		306.9	6.6	308.9	12	335	100	306.9	6.6		0.647459
Zr_M4CZ1_23	160.7	80.9	0.503423		0.0567	0.0036	0.394	0.026	0.05058	0.0013	0.01618	0.0012	0.34439		318.1	8.2	336	19	460	140	318.1	8.2		5.32738
Zr_M4CZ1_15	144.3	74.6	0.516979		0.0561	0.0035	0.403	0.023	0.0512	0.0015	0.01722	0.0012	0.041809		321.6	9	346	17	460	130	321.6	9		7.05202
Zr_M4CZ1_30	206.9	85.5	0.413243		0.0582	0.003	0.695	0.035	0.0855	0.0019	0.02638	0.0015	-0.085678		529	11	534	21	533	120	529	11		0.93633
Zr_M4CZ1_51	910	497	0.546154		0.05978	0.0023	0.799	0.032	0.09723	0.0019	0.02936	0.0015	0.3574		598.1	11	596	18	597	80	598.1	11		-0.352349
Zr_M4CZ1_18	401	107.4	0.26783		0.0623	0.0027	0.944	0.04	0.1103	0.0023	0.0337	0.0019	-0.040698		674.7	13	674	21	673	92	674.7	13		-0.103858
Zr_M4CZ1_49	1125	48.5	0.0431111		0.0741	0.0028	1.218	0.048	0.1206	0.0025	0.0523	0.0032	0.55661		733.8	14	809.9	21	1039	78	733.8	14		9.39622
Zr_M4CZ1_28	165.3	16.89	0.102178		0.0713	0.0031	1.617	0.071	0.165	0.0033	0.0559	0.0047	0.10099		984.2	18	975	28	961	87	984.2	18		-0.94359
Zr_M4CZ1_8	161.3	32.9	0.203968		0.0716	0.0031	1.662	0.073	0.1668	0.0036	0.0482	0.0032	0.17269		995	20	993	28	980	94	995	20		-0.20141
Zr_M4CZ1_52	136.9	49.6	0.362308		0.0729	0.0032	1.687	0.081	0.1682	0.004	0.0498	0.0028	0.33332		1002	22	1005	30	999	93	1002	22		0.298507
Zr_M4CZ1_55	555	56.83	0.102396		0.0732	0.0028	1.741	0.069	0.1719	0.0033	0.0527	0.003	0.064733		1022.5	18	1024.9	25	1015	79	1022.5	18		0.234169
Zr_M4CZ1_7	796	18.31	0.0230025		0.0737	0.0029	1.762	0.069	0.172	0.0034	0.0451	0.0047	0.34233		1023.4	19	1031.3	26	1030	79	1023.4	19		0.766023
Zr_M4CZ1_48	171.7	51.5	0.299942		0.0807	0.0037	1.941	0.09	0.1732	0.0038	0.0595	0.0036	0.31304		1030	21	1094	31	1205	90	1030	21		5.85009
Zr_M4CZ1_39	114.5	70.9	0.619214		0.0733	0.0039	1.777	0.089	0.1752	0.0038	0.0505	0.0028	-0.27618		1041	21	1041	31	1009	110	1041	21		0
Zr_M4CZ1_47	737	24.49	0.0332293		0.0738	0.0028	1.802	0.075	0.177	0.0038	0.0536	0.0038	0.67583		1051	21	1048	29	1032	79	1051	21		-0.28626
Zr_M4CZ1_21	406	38.2	0.0940887		0.0749	0.003	1.838	0.076	0.1791	0.0039	0.0598	0.0036	0.36123		1062	21	1058	27	1065	83	1062	21		-0.378072
Zr_M4CZ1_37	537.9	70.8	0.131623		0.0757	0.003	1.89	0.075	0.1816	0.0036	0.0536	0.003	0.25274		1075.9	20	1077.1	26	1084	79	1075.9	20		0.11141
Zr_M4CZ1_41	299	55.2	0.184615		0.0747	0.003	1.875	0.077	0.182	0.0036	0.0614	0.0035	-0.054408		1077.9	20	1072	27	1059	84	1077.9	20		-0.550373
Zr_M4CZ1_6	897	21	0.0234114		0.0761	0.0029	1.919	0.081	0.1844	0.0038	0.0381	0.004	0.65916		1091	21	1087	28	1094	76	1091	21		-0.367985
Zr_M4CZ1_36	480	164.9	0.343542		0.0782	0.0032	2.021	0.087	0.1869	0.0038	0.0476	0.003	0.044815		1106.3	21	1122	29	1147	82	1106.3	21		1.39929
Zr_M4CZ1_42	194	49.8	0.256701		0.0774	0.0034	2.015	0.088	0.1889	0.0038	0.0546	0.0033	0.14364		1115.3	21	1124	31	1128	88	1115.3	21		0.774021
Zr_M4CZ1_10	760	185.1	0.243553		0.07872	0.003	2.049	0.081	0.1901	0.0036	0.05731	0.003	0.3546		1121.7	19	1131.6	27	1162	75	1121.7	19		0.874867
Zr_M4CZ1_44	80.6	38.8	0.48139		0.0753	0.0035	1.984	0.094	0.1904	0.0043	0.0568	0.0034	0.091079		1123	23	1111	33	1080	96	1123	23		-1.08011
Zr_M4CZ1_35	270.2	87.58	0.32413		0.079	0.0032	2.091	0.089	0.1912	0.0039	0.0575	0.0033	0.18426		1128	21	1148	31	1195	98	1128	21		1.74216
Zr_M4CZ1_11	848	204.6	0.241274		0.07806	0.003	2.059	0.079	0.1928	0.0037	0.05804	0.003	-0.068617		1136.3	20	1134.9	26	1145	76	1136.3	20		-0.123359
Zr_M4CZ1_34	825	270	0.327273		0.07729	0.0029	2.055	0.08	0.1937	0.0039	0.05779	0.003	0.4618		1141.3	21	1135	28	1126	75	1141.3	21		-0.555066
Zr_M4CZ1_54	850	164.7	0.193765		0.079	0.003	2.11	0.14	0.1942	0.0099	0.0629	0.0033	0.9679		1142	53	1150	47	1172	77	1142	53		0.695652
Zr_M4CZ1_2	309.8	90	0.29051		0.0778	0.0031	2.097	0.086	0.1953	0.0038	0.0589	0.0032	0.18878		1150	20	1149	27	1136	79	1150	20		-0.0870322
Zr_M4CZ1_43	280	88.3	0.315357		0.0795	0.0033	2.168	0.089	0.1975	0.0039	0.0586	0.0032	-0.028233		1161.8	21	1174	29	1183	81	1161.8	21		1.03918
Zr_M4CZ1_29	407	129.8	0.318919		0.0787	0.0031	2.14	0.085	0.198	0.0038	0.0578	0.0031	-0.024801		1164.8	20	1161.1	28	1165	80	1164.8	20		-0.318663
Zr_M4CZ1_31	1008	251.6	0.249603		0.07848	0.0029	2.149	0.081	0.1981	0.0037	0.05913	0.003	0.011139		1165.3	20	1164.6	26	1157	73	1165.3	20		-0.0601065
Zr_M4CZ1_33	332.5	133.3	0.400902		0.0787	0.0034	2.136	0.093	0.1987	0.0042	0.0602	0.0033	0.29618		1168	23	1159	30	1156	86	1168	23		-0.776531
Zr_M4CZ1_12	598	72.7	0.121572		0.0781	0.0031	2.12	0.085	0.1988	0.0038	0.0593	0.0038	-0.19873		1168.7	20	1157	30	1147	78	1168.7	20		-1.01124
Zr_M4CZ1_40	1308	265	0.202599		0.07954	0.0029	2.236	0.086	0.2041	0.0039	0.05994	0.0031	0.611		1197.2	21	1192	27	1184	72	1197.2	21		-0.436242
Zr_M4CZ1_22	1299	501	0.385681		0.0792	0.0029	2.234	0.09	0.2048	0.0045	0.06122	0.0031	0.80201		1201	24	1191	28	1175	72	1201	24		-0.839631
Zr_M4CZ1_3	1157	256.6	0.22178		0.08016	0.003	2.31	0.089	0.208	0.0042	0.05967	0.003	0.53505		1218	22	1216.7	29	1199	73	1218	22		-0.106846
Zr_M4CZ1_32	205.4	95.5	0.464946		0.0819	0.0032	2.356	0.096	0.2085	0.0043	0.0611	0.0034	0.35294		1221	23	1229	29	1238	77	1221	23		0.650936
Zr_M4CZ1_5	375	113.3	0.302133		0.0804	0.0031	2.312	0.091	0.2088	0.004	0.0597	0.0032	0.18337		1222.2	22	1217.2	27	1203	76	1222.2	22		-0.410779
Zr_M4CZ1_19	287.3	96.7	0.336582		0.0813	0.0031	2.356	0.094	0.2107	0.0042	0.0624	0.0033	0.26345		1232.6	22	1229	28	1232	79	1232.6	22		-0.292921
Zr_M4CZ1_53	195	69.8	0.357949		0.0783	0.0033	2.34	0.1	0.2146	0.0046	0.0623	0.0036	0.088009		1253	24	1226	30	1148	84	1253	24		-2.20228
Zr_M4CZ1_9	1117	562	0.503133		0.0824	0.0031	2.433	0.094	0.2146	0.0041	0.064	0.0032	0.25924		1253.5	22	1252	28	1256	70	1253.5	22		-0.119808
Zr_M4CZ1_38	113.9	41.8	0.366989		0.0806	0.0036	2.446	0.11	0.2207	0.005	0.0676	0.004	0.17213		1285	26	1254	33	1204	90	1285	26		-2.47209
Zr_M4CZ1_24	148	46.7	0.315541		0.0836	0.0041	2.671	0.13	0.2319	0.0054	0.0672	0.0047	-0.022306		1344	28	1319	35	1271	94	1344	28		-1.89538
Zr_M4CZ1_20	310	102.9	0.331935		0.0818	0.0036	2.702	0.13	0.2393	0.0053	0.0654	0.0038	0.48179		1383	28	1327	34	1234	86	1383	28		-4.22005
Zr_MAT7P1_5	62.1	16.92	0.272464		0.0526	0.0058	0.312	0.035	0.0432	0.0016	0.0153	0.0017	0.20934		272.4	9.6	277	26	290	230	272.4	9.6		1.66065
Zr_MAT7P1_33	821.9	487	0.59253		0.0533	0.0025	0.3195	0.015	0.04386	0.00089	0.01357	0.00072	-0.19812		276.7	5.5	281.2	12	326	110	276.7	5.5		1.60028
Zr_MAT7P1_2	567	242	0.426808		0.0527	0.0025	0.3214	0.015	0.04418	0.00087	0.01404	0.0008	-0.19252		278.7	5.4	282.7	12	314	110	278.7	5.4		1.41493
Zr_MAT7P1_8	729	493	0.676269		0.0545	0.0026	0.3275	0.016	0.04426	0.00091	0.01399	0.00074	0.20879		279.2	5.6	287.3	12	382	110	279.2	5.6		2.81935
Zr_MAT7P1_9	271.1	138.6	0.51125		0.0536	0.0033	0.327	0.019	0.04428	0.00099	0.01338	0.00083	-0.019222		279.3	6.1	288	14	330	130	279.3	6.1		3.02083
Zr_MAT7P1_29	461	235	0.509761		0.0506	0.0025	0.311	0.016	0.04427	0.001	0.01394	0.00081	0.1562		279.3	6.2	274.7	12	205	110	279.3	6.2		-1.67455
Zr_MAT7P1_20	341	189	0.554252		0.0526	0.0029	0.322	0.018	0.04429	0.0011	0.01473	0.0009	0.17109		279.4	6.5	283	14	284	120	279.4	6.5		1.27208
Zr_MAT7P1_7	313	166.4	0.531629		0.0564	0.0029	0.348	0.018	0.04437	0.0011	0.01456	0.00083	0.097945		279.8	6.5	302.4	14	440	120	279.8	6.5		7.47354
Zr_MAT7P1_32	440	235	0.534091		0.0528	0.0026	0.324	0.017	0.04439	0.001	0.01407	0.0008	0.3274		280	6.4	284.2	13	313	110	280	6.4		1.47783
Zr_MAT7P1_17	498	216.4	0.434538		0.0513	0.0027	0.316	0.016	0.04443	0.00095	0.01434	0.00082	-0.088845		280.2	5.8	278.6	12	249	110	280.2	5.8		-0.5743
Zr_MAT7P1_3	272.1	127.9	0.470048		0.0547	0.004	0.336	0.023	0.04451	0.0011	0.01475	0.0009	-0.011999		280.7	6.9	296	17	380	150	280.7	6.9		5.16892
Zr_MAT7P1_4	425	249	0.585882		0.0548	0.0027	0.337	0.017	0.04452	0.00098	0.01314	0.00074	0.11308		280.8	6	294.6	13	396	110	280.8	6		4.68432
Zr_MAT7P1_24	972	708	0.728395		0.0517	0.0023	0.3175	0.014	0.04463	0.00091	0.01338	0.00069	0.072378		281.5	5.6	279.8	11	267	100	281.5	5.6		-0.607577
Zr_MAT7P1_22	1039	492	0.473532		0.0519	0.0022	0.3221	0.014	0.04472	0.00087	0.01475	0.00078	-0.13538		282	5.3	283.4	11	270	98	282	5.3		0.494001
Zr_MAT7P1_27	530	236	0.445283		0.0532	0.0026	0.328	0.016	0.04482	0.00094	0.01432	0.00085	-0.094641		282.6	5.8	288	12	317	110	282.6	5.8		1.875
Zr_MAT7P1_15	867	471	0.543253		0.0516	0.0023	0.3182	0.014	0.04486	0.00093	0.01449	0.00077	-0.0049925		282.9	5.8	280.3	11	267	99	282.9	5.8		-0.927578
Zr_MAT7P1_21	351	219	0.623932		0.0527	0.0029	0.327	0.017	0.04487	0.0011	0.01454	0.00085	0.1168		282.9	6.5	286.8	13	310	120	282.9	6.5		1.35983
Zr_MAT7P1_34	512	236	0.460938		0.0518	0.0026	0.323	0.016	0.0449	0.00097	0.01406	0.0008	0.14273		283.1	6	283.5	12	267	110	283.1	6		0.141093
Zr_MAT7P1_35	393	168.6	0.429008		0.052	0.003	0.323	0.017	0.04489	0.001	0.01371	0.00081	-0.21551		283.1	6.4	283.6	13	260	130	283.1	6.4		0.176305
Zr_MAT7P1_26	525	322.6	0.614476		0.0522	0.0024	0.3238	0.015	0.04495	0.001	0.01387	0.00074	0.14884		283.4	6.2	284.5	12	280	100	283.4	6.2		0.386643
Zr_MAT7P1_13	810	583	0.719753		0.0509	0.0024	0.318	0.014	0.04498	0.00093	0.01403	0.00074	-0.28469		283.6	5.8	280.1	11	234	100	283.6	5.8		-1.24955
Zr_MAT7P1_18	856	462.2	0.539953		0.0518	0.0022	0.3238	0.014	0.04505	0.00093	0.01453	0.00075	0.17913		284	5.8	284.6	11	266	96	284	5.8		0.210822
Zr_MAT7P1_31	374	105.2	0.281283		0.0516	0.0027	0.323	0.017	0.04509	0.001	0.01456	0.00092	0.10851		284.3	6.4	285.4	13	260	120	284.3	6.4		0.385424
Zr_MAT7P1_12	833	368	0.441777		0.051	0.0024	0.3188	0.015	0.04524	0.0009	0.01428	0.00077	0.026595		285.2	5.5	280.7	11	229	100	285.2	5.5		-1.60314
Zr_MAT7P1_10	540	312	0.577778		0.0518	0.0027	0.322	0.017	0.04535	0.00098	0.01364	0.00075	0.048343		285.9	6	284.5	13	269	120	285.9	6		-0.492091
Zr_MAT7P1_6	579	360	0.621762		0.0529	0.0025	0.334	0.016	0.0455	0.00091	0.01454	0.0008	0.11296		286.8	5.6	293	12	325	110	286.8	5.6		2.11604
Zr_MAT7P1_25	373	111.9	0.3		0.0518	0.0026	0.327	0.016	0.04571	0.001	0.01486	0.00095	0.21957		288.1	6.3	287.1	13	284	110	288.1	6.3		-0.348311
Zr_MAT7P1_30	335	118	0.352239		0.0572	0.0029	0.365	0.018	0.04572	0.0011	0.01615	0.001	0.17522		288.2	6.5	315.3	14	502	120	288.2	6.5		8.59499
Zr_MAT7P1_14	574	285	0.496516		0.0531	0.0027	0.337	0.017	0.04603	0.0011	0.01459	0.00088	0.36736		290.1	6.7	294.3	13	314	110	290.1	6.7		1.42712
Zr_MAT7P1_11	534	411	0.769663		0.052	0.0024	0.335	0.017	0.04628	0.00097	0.01457	0.00081	0.2151		291.7	6	293	13	293	110	291.7	6		0.443686
Zr_MAT7P1_16	1338	1120	0.83707		0.05288	0.0021	0.3497	0.014	0.04794	0.00094	0.0146	0.00075	0.30508		301.9	5.8	304.4	11	322	91	301.9	5.8		0.821288
Zr_MAT7P1_23	40.7	12.3	0.302211		0.0705	0.0059	0.99	0.11	0.105	0.0094	0.032	0.0041	0.6886		641	55	691	59	850	170	641	55		7.23589
Zr_MAT7P1_28	774	120	0.155039		0.07214	0.0027	1.709	0.069	0.1707	0.0034	0.0454	0.0025	0.5335		1015.8	19	1011	26	986	78	1015.8	19		-0.474777
Zr_MAT7P1_1	294	177	0.602041		0.084	0.0037	2.297	0.1	0.2006	0.0044	0.0657	0.0038	0.33923		1178	24	1211	30	1286	83	1178	24		2.72502
Zr_MAT7P1_19	587	234.2	0.398978		0.0788	0.0031	2.266	0.091	0.2065	0.0041	0.0625	0.0032	0.28075		1210.3	22	1201	29	1169	72	1210.3	22		-0.774355
Zr_MAT3P4_24	867	531.7	0.613264		0.0552	0.0029	0.278	0.015	0.03643	0.00097	0.01053	0.00063	0.5819		230.6	6	248.5	12	417	110	230.6	6		7.20322
Zr_MAT3P4_22	88.8	26.6	0.29955		0.0511	0.0046	0.299	0.028	0.0416	0.0016	0.0132	0.0014	0.075004		262.4	10	267	23	380	180	262.4	10		1.72285
Zr_MAT3P4_27	159.1	64.7	0.406662		0.0512	0.0036	0.3	0.022	0.04205	0.0011	0.01328	0.00097	0.2216		265.5	6.7	268	18	250	160	265.5	6.7		0.932836
Zr_MAT3P4_1	101.2	39.88	0.394071		0.053	0.0046	0.306	0.024	0.04206	0.0012	0.01355	0.0011	0.11195		265.6	7.7	269	19	290	180	265.6	7.7		1.26394
Zr_MAT3P4	167.9	143.3	0.853484		0.0535	0.0035	0.306	0.02	0.04217	0.0011	0.01247	0.00075	0.16993		266.3	6.6	272	15	340	140	266.3	6.6		2.09559
Zr_MAT3P4_16	94.7	29.42	0.310665		0.0517	0.005	0.305	0.03	0.0427	0.0013	0.0125	0.0014	-0.0020657		269.3	8.2	271	24	210	210	269.3	8.2		0.627306
Zr_MAT3P4_6	109.9	23.35	0.212466		0.0516	0.0063	0.312	0.038	0.04276	0.0012	0.0138	0.0016	-0.031985		269.9	7.4	271	29	190	240	269.9	7.4		0.405904
Zr_MAT3P4_12	86.8	26.48	0.305069		0.0541	0.0054	0.317	0.031	0.0428	0.0013	0.014	0.0012	-0.05937		270	7.8	279	23	330	210	270	7.8		3.22581
Zr_MAT3P4_14	92.4	29.7	0.321429		0.05	0.0045	0.297	0.025	0.0426	0.0015	0.01414	0.0012	0.17468		270.3	8.8	262	19	170	180	270.3	8.8		-3.16794
Zr_MAT3P4_10	121.4	32.41	0.266969		0.0498	0.0039	0.296	0.021	0.0429	0.0013	0.0139	0.0013	-0.16113		270.8	8	261	16	160	160	270.8	8		-3.75479
Zr_MAT3P4_17	71.5	23.48	0.328392		0.0519	0.0054	0.302	0.028	0.0428	0.0015	0.0136	0.0015	-0.21276		271.8	9.1	269	22	260	220	271.8	9.1		-1.04089
Zr_MAT3P4_11	114.2	37.2	0.325744		0.0541	0.0046	0.323	0.026	0.04311	0.0012	0.0138	0.0012	-0.18833		272	7.1	282	20	290	180	272	7.1		3.5461
Zr_MAT3P4_20	115.8	38.26	0.330397		0.0498	0.004	0.302	0.023	0.04313	0.001	0.0143	0.0013	-0.1805		272.2	6.4	268	18	210	170	272.2	6.4		-1.56716
Zr_MAT3P4_32	92.7	28.6	0.308522		0.0556	0.0054	0.323	0.036	0.0433	0.0013	0.0141	0.0016	0.14914		273	7.9	294	27	420	210	273	7.9		7.14286
Zr_MAT3P4_31	79.9	21.4	0.267835		0.0529	0.0051	0.323	0.029	0.0437	0.0014	0.0158	0.0015	-0.053921		275.4	8.9	285	23	350	200	275.4	8.9		3.36842
Zr_MAT3P4_5	85.9	26.91	0.313271		0.052	0.0043	0.316	0.025	0.0441	0.0015	0.014	0.0013	0.19956		277.9	9.2	283	19	250	170	277.9	9.2		1.80212
Zr_MAT3P4_21	97.6	20.9	0.214139		0.0553	0.0051	0.332	0.028	0.04415	0.0012	0.014	0.0015	-0.12979		278.5	7.7	289	21	370	190	278.5	7.7		3.63322
Zr_MAT3P4_28	67	12.29	0.183433		0.0548	0.0056	0.316	0.032	0.0442	0.0018	0.015	0.0023	0.1732		278.5	11	280	25	310	210	278.5	11		0.535714
Zr_MAT3P4_2	16.37	12.32	0.752596		0.064	0.01	0.366	0.06	0.0443	0.0023	0.0131	0.0017	0.2681		279	14	326	43	580	310	279	14		14.4172
Zr_MAT3P4_4	97.1	28.3	0.291452		0.0593	0.0051	0.361	0.031	0.0445	0.0014	0.017	0.0014	0.15757		280.4	8.3	313	23	510	180	280.4	8.3		10.4153
Zr_MAT3P4_34	352.6	119.5	0.338911		0.0504	0.0027	0.317	0.016	0.04457	0.0011	0.01488	0.00095	-0.078894		281.1	6.7	281	12	212	120	281.1	6.7		-0.0355872
Zr_MAT3P4_8	316	118.3	0.374367		0.0507	0.0028	0.313	0.016	0.0447	0.0011	0.01428	0.00095	-0.040388		281.9	6.5	276.4	12	215	110	281.9	6.5		-1.98987
Zr_MAT3P4_35	398	186.7	0.469095		0.0515	0.0027	0.315	0.016	0.04475	0.00099	0.01411	0.00085	0.073763		282.2	6.1	277.8	13	251	120	282.2	6.1		-1.58387
Zr_MAT3P4_18	267	102.3	0.383146		0.0529	0.003	0.329	0.018	0.04484	0.00097	0.01432	0.00091	-0.2168		282.7	6	287.9	14	307	130	282.7	6		1.80618
Zr_MAT3P4_29	393	147.6	0.375573		0.0521	0.0026	0.326	0.016	0.04494	0.00099	0.01362	0.00084	0.15747		283.4	6.1	287.3	13	311	110	283.4	6.1		1.35747
Zr_MAT3P4_26	348	147.2	0.422989		0.0515	0.003	0.327	0.018	0.045	0.00098	0.01445	0.00089	0.15741		283.8	6.1	286	14	260	130	283.8	6.1		0.769231
Zr_MAT3P4_33	469	166	0.353945		0.051	0.0028	0.32	0.018	0.04522	0.001	0.01435	0.00086	-0.036321		285.1	6.3	281	13	220	120	285.1	6.3		-1.45907
Zr_MAT3P4_13	251	101.7	0.405179		0.0508	0.003	0.314	0.018	0.04526	0.00098	0.01455	0.00086	-0.11606		285.3	6	277	14	240	130	285.3	6		-2.99639
Zr_MAT3P4_19	320.3	135.2	0.422104		0.0531	0.0032	0.328	0.02	0.04528	0.001	0.01408	0.00086	0.22978		285.5	6.4	287	15	310	130	285.5	6.4		0.522648
Zr_MAT3P4_9	296	97.3	0.328716		0.0545	0.003	0.345	0.018	0.0454	0.001	0.01536	0.00094	0.0063079		286.2	6.3	300.1	14	391	120	286.2	6.3		4.63179
Zr_MAT3P4_30	437	231	0.528604		0.0517	0.0027	0.322	0.016	0.04547	0.001	0.01429	0.00083	0.12232		286.7	6.1	282.9	13	249	110	286.7	6.1		-1.34323
Zr_MAT3P4_3	391	185	0.473146		0.0526	0.0026	0.335	0.018	0.04583	0.0011	0.01515	0.00088	0.31024		288.9	6.6	292.9	13	292	110	288.9	6.6		1.36565
Zr_MAT3P4_15	146	58.2	0.39863		0.0545	0.0036	0.343	0.021	0.04628	0.0012	0.01459	0.0012	-0.068392		291.6	7.2	298	16	360	140	291.6	7.2		2.14765
Zr_MAT3P4_25	198	73.6	0.371717		0.0519	0.0031	0.331	0.02	0.04634	0.0011	0.01434	0.001	0.15899		292	6.7	291	15	280	130	292	6.7		-0.343643
Zr_MAT3P4_7	179.2	99.7	0.556362		0.0716	0.003	1.611	0.068	0.1631	0.0034	0.0509	0.0029	0.1505		976	20	978	26	968	84	976	20		0.204499
Zr_MAT3P4_23	287	70.1	0.244251		0.0716	0.0031	1.638	0.072	0.1663	0.0036	0.0538	0.0032	0.2973		991	20	984	28	968	88	991	20		-0.711382
Zr_MAT5P1_28	865	651	0.752601		0.0517	0.0024	0.2711	0.014	0.03789	0.0011	0.00879	0.00066	0.5348		239.7	6.7	243.3	11	270	110	239.7	6.7		1.47965
Zr_MAT5P1_5	85.9	37.27	0.433877		0.0583	0.0052	0.347	0.028	0.0437	0.0013	0.0134	0.0012	-0.21763		275.5	8.2	301	21	480	200	275.5	8.2		8.47176
Zr_MAT5P1_29	303	108.1	0.356766		0.0524	0.0033	0.316	0.02	0.04367	0.00098	0.01354	0.00085	0.12571		275.5	6	280	15	290	140	275.5	6		1.60714
Zr_MAT5P1_23	488	216.5	0.443648		0.0531	0.0027	0.321	0.016	0.04382	0.00093	0.0138	0.0008	-0.28512		276.4	5.7	282.4	13	310	120	276.4	5.7		2.12465
Zr_MAT5P1_1	362.9	157.1	0.432902		0.0532	0.0028	0.326	0.018	0.04386	0.00093	0.0145	0.00092	0.03641		276.7	5.8	288	14	343	130	276.7	5.8		3.92361
Zr_MAT5P1_4	699	288	0.412017		0.0504	0.0024	0.3088	0.015	0.04398	0.00099	0.01358	0.00076	-0.041132		277.4	6.1	272.9	11	249	120	277.4	6.1		-1.64896
Zr_MAT5P1_17	421	232	0.551069		0.0515	0.0031	0.314	0.018	0.04409	0.00095	0.014	0.00084	0.197		278.1	5.9	277	14	240	130	278.1	5.9		-0.397112
Zr_MAT5P1_11	311	112.7	0.362379		0.0511	0.0028	0.309	0.017	0.04416	0.00098	0.01374	0.00091	0.16124		278.6	6	273.3	13	242	120	278.6	6		-1.93926
Zr_MAT5P1_24	606.7	291.2	0.479974		0.0544	0.0026	0.3291	0.015	0.04416	0.0009	0.01446	0.00079	-0.16394		278.6	5.5	288.6	12	366	110	278.6	5.5		3.465
Zr_MAT5P1_6	536	237	0.442164		0.0549	0.0028	0.3352	0.015	0.04455	0.001	0.01505	0.00092	-0.23908		281	6.3	293.3	12	387	110	281	6.3		4.19366
Zr_MAT5P1_18	291	92.3	0.317182		0.0531	0.0033	0.328	0.019	0.04461	0.0011	0.01484	0.00097	0.23035		281.3	6.6	287	15	330	140	281.3	6.6		1.98606
Zr_MAT5P1_34	469	244	0.520256		0.0534	0.0024	0.3243	0.015	0.04469	0.00096	0.01349	0.00077	0.26852		281.8	5.9	284.9	12	334	100	281.8	5.9		1.0881
Zr_MAT5P1_33	274.5	97.6	0.355556		0.051	0.003	0.315	0.019	0.04473	0.0011	0.01417	0.00092	0.23559		282	6.9	279	15	230	130	282	6.9		-1.07527
Zr_MAT5P1_7	199.8	76.9	0.384885		0.0542	0.0032	0.333	0.019	0.04476	0.0011	0.01504	0.0011	-0.32689		282.3	6.5	291	14	370	140	282.3	6.5		2.98969
Zr_MAT5P1_2	403.7	155	0.383948		0.0515	0.0028	0.317	0.018	0.04481	0.00094	0.01459	0.00088	0.18329		282.5	5.8	279	14	237	120	282.5	5.8		-1.25448
Zr_MAT5P1_25	297	169	0.569024		0.0556	0.0036	0.341	0.022	0.0448	0.0012	0.01353	0.00086	0.090925		282.5	7.3	297	17	410	150	282.5	7.3		4.88215
Zr_MAT5P1_12	450.4	158	0.350799		0.051	0.0027	0.317	0.016	0.04492	0.00099	0.01401	0.00091	0.0035929		283.2	6.1	279.3	13	224	120	283.2	6.1		-1.39635
Zr_MAT5P1_35	384	122.8	0.319792		0.052	0.0028	0.323	0.018	0.04497	0.001	0.01434	0.00096	0.20648		283.6	6.4	284	14	264	120	283.6	6.4		0.140845
Zr_MAT5P1_15	360	125.3	0.348056		0.051	0.0031	0.318	0.019	0.04499	0.0011	0.01456	0.00093	0.27962		283.7	6.7	280	15	230	130	283.7	6.7		-1.32143
Zr_MAT5P1_19	513	278	0.54191		0.053	0.0025	0.327	0.016	0.04503	0.0011	0.01425	0.00079	0.16573		283.9	6.7	288.3	12	331	110	283.9	6.7		1.52619
Zr_MAT5P1_30	280.1	94.6	0.337737		0.0499	0.0036	0.313	0.023	0.04507	0.0012	0.01529	0.0011	-0.049808		284.2	7.6	276	17	220	150	284.2	7.6		-2.97101
Zr_MAT5P1_21	372	148.8	0.4		0.0511	0.003	0.324	0.018	0.04513	0.001	0.01437	0.00087	-0.1523		284.5	6.2	284	14	250	140	284.5	6.2		-0.176056
Zr_MAT5P1_13	317	172	0.542587		0.0499	0.003	0.316	0.018	0.04518	0.001	0.0146	0.00087	0.0049367		284.8	6.3	278	14	200	140	284.8	6.3		-2.44604
Zr_MAT5P1_20	279.4	111.69	0.399749		0.0512	0.0029	0.321	0.018	0.04522	0.0011	0.01395	0.00087	0.022035		285.1	6.5	282	14	240	130	285.1	6.5		-1.09929
Zr_MAT5P1_27	190	71.5	0.376316		0.0509	0.0031	0.316	0.018	0.04527	0.0012	0.01453	0.001	-0.068116		285.4	7.4	279	14	230	130	285.4	7.4		-2.29391
Zr_MAT5P1_26	490	268.5	0.547959		0.052	0.0025	0.326	0.016	0.04549	0.001	0.01354	0.0008	0.22465		286.8	6.1	286.2	12	280	110	286.8	6.1		-0.209644
Zr_MAT5P1_8	765	384	0.501961		0.0522	0.0024	0.3281	0.016	0.04569	0.0012	0.01429	0.00078	0.36793		288	7.2	287.8	12	294	100	288	7.2		-0.0694927
Zr_MAT5P1_32	292	132.4	0.453425		0.0521	0.0029	0.324	0.018	0.04573	0.0011	0.01462	0.0011	0.090226		288.3	6.9	285	14	270	120	288.3	6.9		-1.15789
Zr_MAT5P1_22	343	134	0.390671		0.0518	0.0033	0.326	0.021	0.0459	0.001	0.01458	0.00093	0.18881		289.3	6.3	288	17	250	140	289.3	6.3		-0.451389
Zr_MAT5P1_9	212	78.7	0.371226		0.0532	0.0032	0.333	0.02	0.04602	0.0011	0.01556	0.0011	0.20718		290	6.5	291	15	340	140	290	6.5		0.343643
Zr_MAT5P1_16	412	166	0.402913		0.0525	0.0028	0.336	0.019	0.0462	0.0011	0.01506	0.00092	0.23013		291.1	6.9	294	14	284	120	291.1	6.9		0.986395
Zr_MAT5P1_3	283	130.5	0.461131		0.0519	0.0034	0.335	0.022	0.04633	0.0011	0.01439	0.00095	0.041128		291.9	6.9	292	17	280	150	291.9	6.9		0.0342466
Zr_MAT5P1_14	567	218	0.38448		0.0507	0.0033	0.328	0.021	0.04698	0.0011	0.0166	0.0013	-0.098324		296	7	288	16	210	150	296	7		-2.77778
Zr_MAT5P1_31	184	84.7	0.460326		0.0598	0.0046	0.388	0.029	0.04732	0.0012	0.01577	0.0011	0.10933		298	7.3	334	21	550	160	298	7.3		10.7784
Zr_MAT5P1_10	369	102.2	0.276965		0.0723	0.0031	1.47	0.12	0.1483	0.0098	0.0487	0.003	0.92519		889	55	914	49	983	88	889	55		2.73523
Zr_M2V9_17	589	236.8	0.402037		0.0534	0.0026	0.3133	0.015	0.04277	0.00094	0.01338	0.00084	0.14511		270	5.8	276.4	12	345	110	270	5.8		2.31548
Zr_M2V9_23	305.9	116.9	0.382151		0.0608	0.004	0.369	0.023	0.04345	0.0012	0.01739	0.0012	-0.24899		274.1	7.5	318	17	650	140	274.1	7.5		13.805
Zr_M2V9_15	347	165.7	0.477522		0.0524	0.0038	0.321	0.022	0.04347	0.0012	0.01385	0.00089	0.15966		274.3	7.2	282	17	300	150	274.3	7.2		2.7305
Zr_M2V9_25	489	270.7	0.553579		0.0523	0.0027	0.318	0.016	0.04392	0.00098	0.01354	0.00079	0.14027		277.1	6.1	279.8	13	289	110	277.1	6.1		0.964975
Zr_M2V9_3	490.4	190	0.387439		0.0529	0.0025	0.325	0.016	0.04423	0.00095	0.01424	0.0008	0.056547		279	5.9	285.3	12	320	100	279	5.9		2.2082
Zr_M2V9_28	551	283	0.513612		0.0518	0.0027	0.316	0.017	0.0443	0.001	0.014	0.00081	0.22816		279.4	6.2	278.8	13	276	120	279.4	6.2		-0.215208
Zr_M2V9_24	292	111.6	0.382192		0.0516	0.0027	0.323	0.017	0.04434	0.001	0.01431	0.00097	0.15504		279.7	6.3	285.4	14	291	120	279.7	6.3		1.9972
Zr_M2V9_20	347.6	133.3	0.383487		0.0526	0.0027	0.324	0.016	0.04445	0.00099	0.0137	0.00089	-0.096535		280.3	6.1	284.5	12	332	120	280.3	6.1		1.47627
Zr_M2V9_31	380	277	0.728947		0.054	0.0031	0.336	0.02	0.04444	0.00093	0.01384	0.00076	0.1237		280.3	5.8	293	15	390	130	280.3	5.8		4.33447
Zr_M2V9_32	486	221.7	0.456173		0.053	0.0027	0.327	0.017	0.04446	0.001	0.01364	0.00082	0.26937		280.4	6.2	286.8	13	311	110	280.4	6.2		2.23152
Zr_M2V9_10	464	168.3	0.362716		0.0525	0.003	0.323	0.018	0.04455	0.0011	0.01418	0.00087	-0.049788		280.9	6.5	283.6	13	279	120	280.9	6.5		0.952045
Zr_M2V9_8	110	53.6	0.487273		0.0553	0.0064	0.33	0.036	0.0446	0.0015	0.0142	0.0014	0.080061		281.3	9.4	287	27	310	230	281.3	9.4		1.98606
Zr_M2V9_6	412	180	0.436893		0.0522	0.0029	0.323	0.019	0.04467	0.001	0.01403	0.00086	0.17857		281.7	6.3	283	14	280	130	281.7	6.3		0.459364
Zr_M2V9_26	456	291	0.638158		0.0543	0.0027	0.328	0.018	0.04468	0.001	0.01397	0.00077	0.15207		281.7	6.2	288	14	364	110	281.7	6.2		2.1875
Zr_M2V9_22	590	268.5	0.455085		0.0519	0.0024	0.3217	0.015	0.04476	0.00097	0.01454	0.00081	0.30838		282.3	6	282.9	12	269	110	282.3	6		0.212089
Zr_M2V9_29	274	95.6	0.348905		0.0527	0.0038	0.326	0.022	0.04478	0.0012	0.01502	0.0011	-0.20427		282.3	7.4	285	17	310	150	282.3	7.4		0.947368
Zr_M2V9_4	426	149.2	0.350235		0.0545	0.0027	0.341	0.016	0.04481	0.001	0.01449	0.00084	-0.0091129		282.6	6.3	297.4	12	379	110	282.6	6.3		4.97646
Zr_M2V9_19	945	785	0.830688		0.0522	0.0024	0.3248	0.015	0.04485	0.00094	0.01416	0.00074	-0.029812		282.8	5.8	285.4	11	291	100	282.8	5.8		0.911002
Zr_M2V9_16	386	131	0.339378		0.0526	0.0027	0.326	0.016	0.04498	0.0011	0.01477	0.00092	0.15387		283.6	6.9	287.5	13	307	110	283.6	6.9		1.35652
Zr_M2V9_7	451	161	0.356984		0.0526	0.003	0.326	0.019	0.04503	0.0011	0.0143	0.00088	0.30259		283.9	6.6	288	14	331	120	283.9	6.6		1.42361
Zr_M2V9_33	419	188	0.448687		0.0502	0.0027	0.314	0.017	0.04502	0.001	0.01399	0.0009	0.092765		283.9	6.3	276.9	13	198	120	283.9	6.3		-2.52799
Zr_M2V9_1	429.6	194.9	0.453678		0.0507	0.0025	0.318	0.016	0.04512	0.001	0.01483	0.00088	0.15191		284.5	6.2	280	12	222	110	284.5	6.2		-1.60714
Zr_M2V9_9	522	230.1	0.440805		0.0519	0.0025	0.323	0.016	0.04518	0.00094	0.01429	0.00081	0.15755		284.9	5.8	284	12	269	110	284.9	5.8		-0.316901
Zr_M2V9_21	268	120.4	0.449254		0.0512	0.003	0.324	0.019	0.0452	0.0011	0.01458	0.00089	0.20643		285	6.7	284	15	260	130	285	6.7		-0.352113
Zr_M2V9_37	298	135.7	0.455369		0.0538	0.0034	0.338	0.021	0.04539	0.001	0.01411	0.00089	0.1571		286.1	6.4	297	16	350	140	286.1	6.4		3.67003
Zr_M2V9_36	337	146	0.433234		0.0514	0.0028	0.321	0.018	0.04541	0.001	0.01455	0.00088	0.28282		286.3	6.5	284	13	237	120	286.3	6.5		-0.809859
Zr_M2V9_5	339	116.9	0.344838		0.0551	0.0035	0.344	0.021	0.04555	0.001	0.0155	0.0011	-0.074579		287.1	6.5	303	16	400	150	287.1	6.5		5.24752
Zr_M2V9_38	389	136.3	0.350386		0.0543	0.0027	0.34	0.017	0.0456	0.001	0.01495	0.00098	0.21181		287.4	6.4	296.4	13	372	120	287.4	6.4		3.03644
Zr_M2V9_13	402.2	165.1	0.410492		0.0502	0.0025	0.317	0.016	0.04563	0.00098	0.01444	0.00092	0.21558		287.6	6	278.9	13	191	110	287.6	6		-3.1194
Zr_M2V9_12	594	477	0.80303		0.0507	0.0022	0.3211	0.014	0.04566	0.00096	0.01439	0.00077	-0.13957		287.8	5.9	283.5	11	226	97	287.8	5.9		-1.51675
Zr_M2V9_35	458	173.1	0.377948		0.0525	0.0025	0.333	0.017	0.04593	0.001	0.0146	0.00087	0.2054		289.5	6.1	293.2	12	320	110	289.5	6.1		1.26194
Zr_M2V9_27	486	194	0.399177		0.0511	0.0023	0.324	0.016	0.04599	0.001	0.015	0.00091	0.19143		289.8	6.3	285	12	233	100	289.8	6.3		-1.68421
Zr_M2V9_11	370	136	0.367568		0.0541	0.0031	0.34	0.019	0.04624	0.0011	0.01453	0.00092	0.0038376		291.3	7	296	15	344	120	291.3	7		1.58784
Zr_M2V9_18	156	103	0.660256		0.0542	0.0036	0.347	0.024	0.04638	0.0013	0.0138	0.00093	0.30507		292.3	7.8	301	18	370	150	292.3	7.8		2.89037
Zr_M2V9_14	264	89.9	0.34053		0.0537	0.003	0.352	0.019	0.04655	0.0011	0.01589	0.0012	-0.023324		293.3	6.6	305	14	360	130	293.3	6.6		3.83607
Zr_M2V9_2	266.3	101.3	0.380398		0.0524	0.0035	0.337	0.021	0.04659	0.0011	0.01561	0.0012	-0.30868		293.5	7	294	16	290	150	293.5	7		0.170068
Zr_M2V9_30	322	133	0.413043		0.051	0.0032	0.33	0.02	0.04678	0.0012	0.01556	0.00094	0.076386		294.7	7.4	289	15	240	130	294.7	7.4		-1.97232
Zr_M2V9_34	290	115.5	0.398276		0.0541	0.0031	0.351	0.021	0.04733	0.0012	0.01572	0.001	0.28404		298.9	7.4	305	16	376	130	298.9	7.4		2
1: U and Th concentrations are calculated employing an external standard zircon as in Paton et al., 2010, Geochemistry, Geophysics, Geosystems.
2: 2 sigma uncertainties propagated according to Paton et al., 2010,Geochemistry, Geophysics, Geosystems
207Pb/206Pb ratios, ages and errors are calculated according to Petrus and Kamber, 2012, Geostandards Geoanalytical Research
Analyzed spots were 23 micrometers, using an analytical protocol modified from Solari et al., 2018.
Data measured employing a Thermo iCapQc ICPMS coupled to a Resonetics, Resolution M050 excimer laser workstation.
